# Supplementary material for: The Accuracy of Retrospective Recall of Childhood ADHD: Results from a Longitudinal Study
Source: Springer Nature journal article supplement (doi:10.1007/s10862-020-09852-1), 2020-12-07
Supplement: MOESM1 [file 18664962]

*Table S1:* Descriptive item-level statistics for the FBB-ADHS (*n* = 55)

|  |  | *M* (*SD*) | item score ≥ 2 |
| --- | --- | --- | --- |
| Inattention (11 items) | |  |  |
| 1 | Has difficulty sustaining attention to tasks or play activities he or she starts | 1.35 (0.89) | 47.3% |
| 2 | Has difficulty sticking to a play activity | 1.73 (0.89) | 61.8% |
| 3 | Fails to finish tasks or play activities | 1.81 (0.91) | 59.3% |
| 4 | Engages in exceptionally short activities | 1.18 (0.91) | 32.7% |
| 5 | Often loses things necessary for tasks or activities | 1.58 (1.10) | 55.5% |
| 6 | Is easily distracted by extraneous stimuli | 2.60 (0.56) | 96.4% |
| 7 | Needs lots of short breaks when working on tasks | 1.85 (0.87) | 69.1% |
| 8 | Has difficulty sustaining attention to tasks | 2.00 (0.84) | 76.4% |
| 9 | Has difficulty concentrating on homework or reading assignments | 2.50 (0.69) | 92.6% |
| 10 | Has difficulty finishing tasks although obviously trying hard to do so | 1.51 (1.07) | 47.3% |
| 11 | Often does not seem to listen | 1.94 (0.90) | 68.5% |
| Hyperactivity-Impulsivity (12 items) | |  |  |
| 12 | Is excessively active when it is inappropriate | 2.22 (0.74) | 85.2% |
| 13 | Puts himself in danger by acting thoughtless | 1.28 (1.14) | 54.4% |
| 14 | Leaves seat, runs, or jumps when he or she is engaged in a task | 1.85 (1.06) | 61.8% |
| 15 | Has difficulty sitting still or fidgets excessively | 1.71 (1.01) | 56.4% |
| 16 | Often leaves seat and runs around when sitting still is required | 2.20 (0.87) | 78.2% |
| 17 | Has difficulty playing calm and still | 1.47 (1.02) | 49.1% |
| 18 | Often shifts from one task or activity to another | 1.60 (0.97) | 54.5% |
| 19 | Has difficulty staying seated when sitting still is required | 2.25 (0.80) | 85.5% |
| 20 | Often interrupts others | 2.36 (0.80) | 87.3% |
| 21 | Often blurts out answers before questions have been completed | 1.67 (1.06) | 52.7% |
| 22 | Has difficulty awaiting turn in games or group situations | 2.17 (0.97) | 79.6% |
| 23 | Talks excessively | 1.85 (0.98) | 66.7% |

*Note. M* = Mean, *SD* = Standard deviation, FBB-ADHS = ADHD parent rating scale at pre-intervention. An item score ≥ 2 is considered to reflect fulfillment of the symptom criterion.

*Table S2:* Descriptive item-level statistics for the FEA-FSB (*n* = 53)

|  |  | *M* (*SD*) | item score ≥ 2 |
| --- | --- | --- | --- |
| Inattention (9 items) | |  |  |
| 1 | Often failed to give close attention to details or made careless mistakes in schoolwork or during other activities | 1.66 (0.83) | 58.5% |
| 2 | Often had difficulty sustaining attention in tasks or play activities | 1.75 (0.81) | 64.2% |
| 3 | Often did not seem to listen when spoken to directly | 1.13 (0.97) | 34.0% |
| 4 | Often did not follow through on instructions and failed to finish schoolwork or other duties | 1.65 (1.01) | 52.8% |
| 5 | Often had difficulty organizing tasks and activities | 1.21 (0.93) | 35.8% |
| 6 | Often avoided or was reluctant to engage in tasks that required sustained mental effort | 1.64 (0.88) | 49.1% |
| 7 | Oft list things necessary for tasks or activities | 0.74 (0.90) | 22.6% |
| 8 | Was easily distracted | 2.25 (0.88) | 79.2% |
| 9 | Was often forgetful in daily activities | 1.04 (0.95) | 30.2% |
| Hyperactivity-Impulsivity (11 items) | |  |  |
| 10 | Often fidgeted with or tapped had or feet or squirmed in seat | 1.74 (1.10) | 58.5% |
| 11 | Often left seat in the classroom or other situations when remaining seated was expected | 0.96 (1.09) | 34.0% |
| 12 | Often unable to play or engage in in leisure activities quietly | 1.11 (0.93) | 30.2% |
| 13 | Often jumped up and ran around in situations where it was inappropriate | 0.94 (1.01) | 24.5% |
| 14 | Often felt extreme restlessness | 1.37 (0.93) | 47.2% |
| 15 | Showed a persistent pattern of excessive motor activity | 1.13 (1.02) | 35.8% |
| 16 | Was often “on-the-go” or acted as “driven by a motor” | 1.34 (1.09) | 43.4% |
| 17 | Often blurt out answers before questions have been completed | 1.15 (0.99) | 37.7% |
| 18 | Often had difficulty waiting for my turn | 1.43 (1.01) | 50.9% |
| 19 | Often interrupted or intruded on others | 1.57 (1.01) | 49.1% |
| 20 | Often talked excessively | 1.21 (0.97) | 32.1% |

*Note. M* = Mean, *SD* = Standard deviation, FEA-FSB = self-rating scale for retrospective recall of childhood ADHD symptoms. An item score ≥ 2 is considered to reflect fulfillment of the symptom criterion.

*Table S2:* Descriptive item-level statistics for the FEA-FFB (*n* = 49)

|  |  | *M* (*SD*) | item score ≥ 2 |
| --- | --- | --- | --- |
| Inattention (9 items) | |  |  |
| 1 | Often failed to give close attention to details or made careless mistakes in schoolwork or during other activities | 2.12 (0.79) | 77.6% |
| 2 | Often had difficulty sustaining attention in tasks or play activities | 2.12 (0.75) | 77.6% |
| 3 | Often did not seem to listen when spoken to directly | 1.46 (0.82) | 44.9% |
| 4 | Often did not follow through on instructions and failed to finish schoolwork or other duties | 1.92 (0.94) | 67.3% |
| 5 | Often had difficulty organizing tasks and activities | 1.69 (0.96) | 63.3% |
| 6 | Often avoided or was reluctant to engage in tasks that required sustained mental effort | 2.14 (0.74) | 79.6% |
| 7 | Oft list things necessary for tasks or activities | 1.45 (1.14) | 46.9% |
| 8 | Was easily distracted | 2.35 (0.78) | 81.6% |
| 9 | Was often forgetful in daily activities | 1.65 (0.86) | 57.1% |
| Hyperactivity-Impulsivity (11 items) | |  |  |
| 10 | Often fidgeted with or tapped had or feet or squirmed in seat | 2.02 (1.03) | 65.3% |
| 11 | Often left seat in the classroom or other situations when remaining seated was expected | 1.90 (1.10) | 63.3% |
| 12 | Often unable to play or engage in in leisure activities quietly | 1.55 (0.91) | 51.0% |
| 13 | Often jumped up and ran around in situations where it was inappropriate | 1.80 (1.00) | 59.2% |
| 14 | Often felt extreme restlessness | 1.51 (0.98) | 49.0% |
| 15 | Showed a persistent pattern of excessive motor activity | 1.53 (1.02) | 51.0% |
| 16 | Was often “on-the-go” or acted as “driven by a motor” | 1.63 (1.15) | 55.1% |
| 17 | Often blurt out answers before questions have been completed | 1.49 (0.92) | 53.1% |
| 18 | Often had difficulty waiting for his or her turn | 1.86 (1.04) | 63.3% |
| 19 | Often interrupted or intruded on others | 1.76 (1.01) | 63.3% |
| 20 | Often talked excessively | 1.31 (0.96) | 40.8% |

*Note. M* = Mean, *SD* = Standard deviation, FEA-FFB = proxy rating scale for retrospective recall of childhood ADHD symptoms. An item score ≥ 2 is considered to reflect fulfillment of the symptom criterion.
